# Supplementary material for: A comparison of two methods for estimating critical swimming speed (Ucrit) in larval fathead minnows: the laminar flow assay and the spinning task assay
Source: Oxford University Press journal article supplement (doi:10.1242/jeb.242856), 2021-11-24
Supplement: jeb242856supp.pdf [file jeb242856supp.pdf]

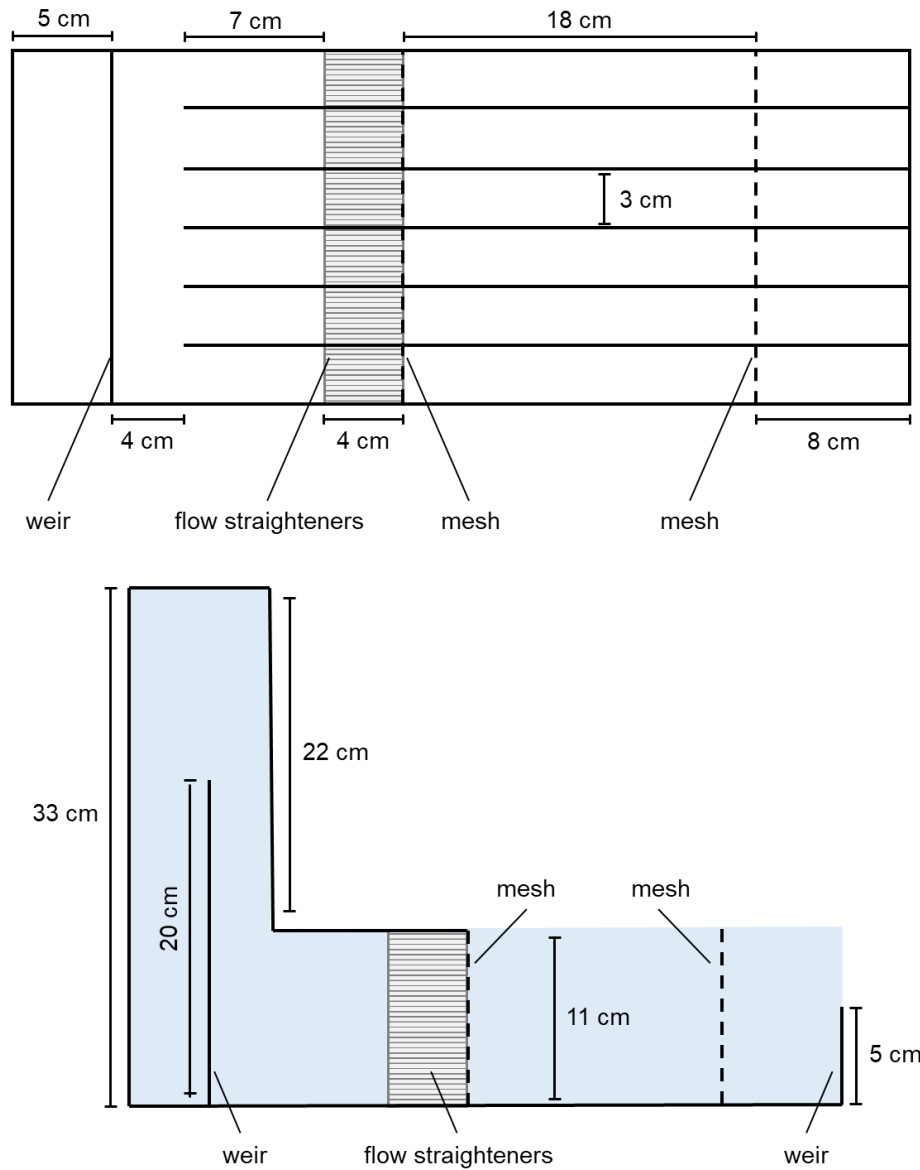

**Fig. S1.** Top-down and side view of the laminar swim flume used in the present study, along with dimensions.
